# Supplementary material
Source: PubMed Central journal article supplement (PMC1858659)
Supplement: NIHMS18819-supplement-Supp.pdf [file NIHMS18819-supplement-Supp.pdf]

## Supplemental Data

### Targeting of Aberrant mRNAs to Cytoplasmic Processing Bodies

Ujwal Sheth and Roy Parker

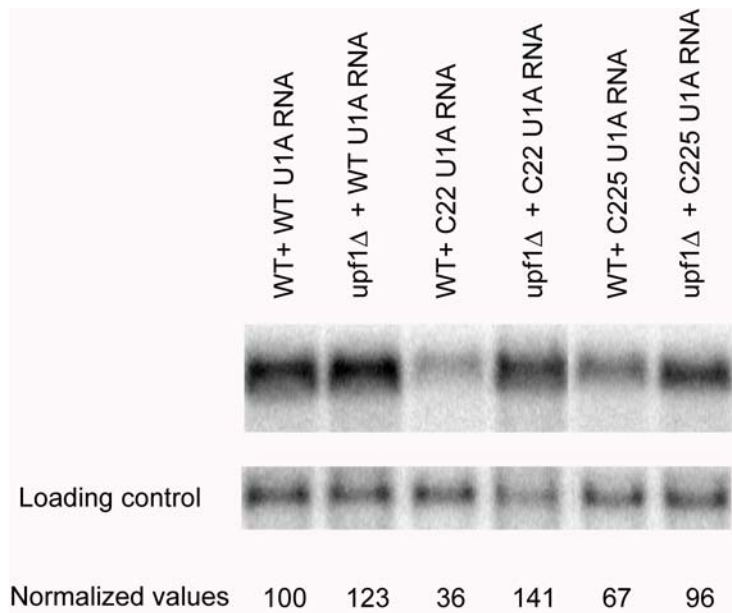

#### Figure S1. Northern Analysis of U1A Reporter mRNAs

Steady-state level comparison of PGK1 U1A mRNA (WT, C22 and C225) in wild-type and upf1 $\Delta$  strains respectively. The normalized values of PGK1 reporter mRNA are shown at the bottom of the gel. The quantification is done by normalizing to the levels of endogenous PGK1 mRNA as shown in the loading control.

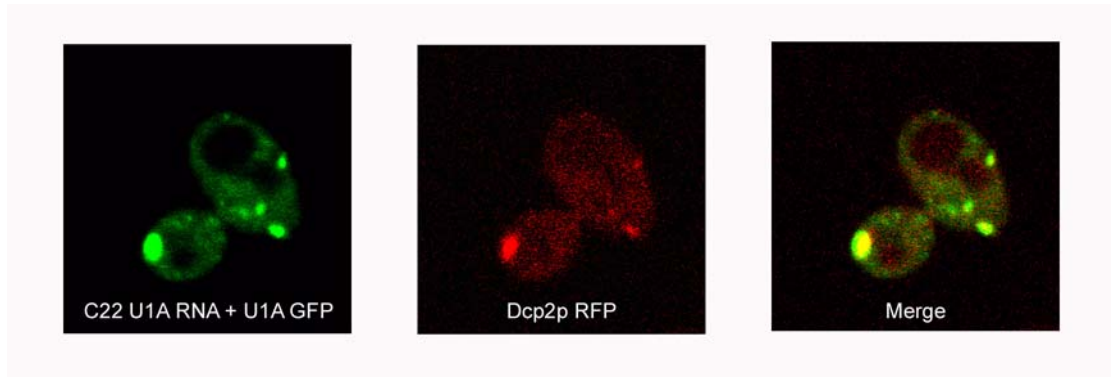

**Figure S2. Colocalization of PTC-Containing mRNA with Dcp2p-GFP**

Left, full length reporter mRNA with a premature stop codon at position 22; middle, Dcp2pRFP; and right, the merge generated by Adobe Photoshop.

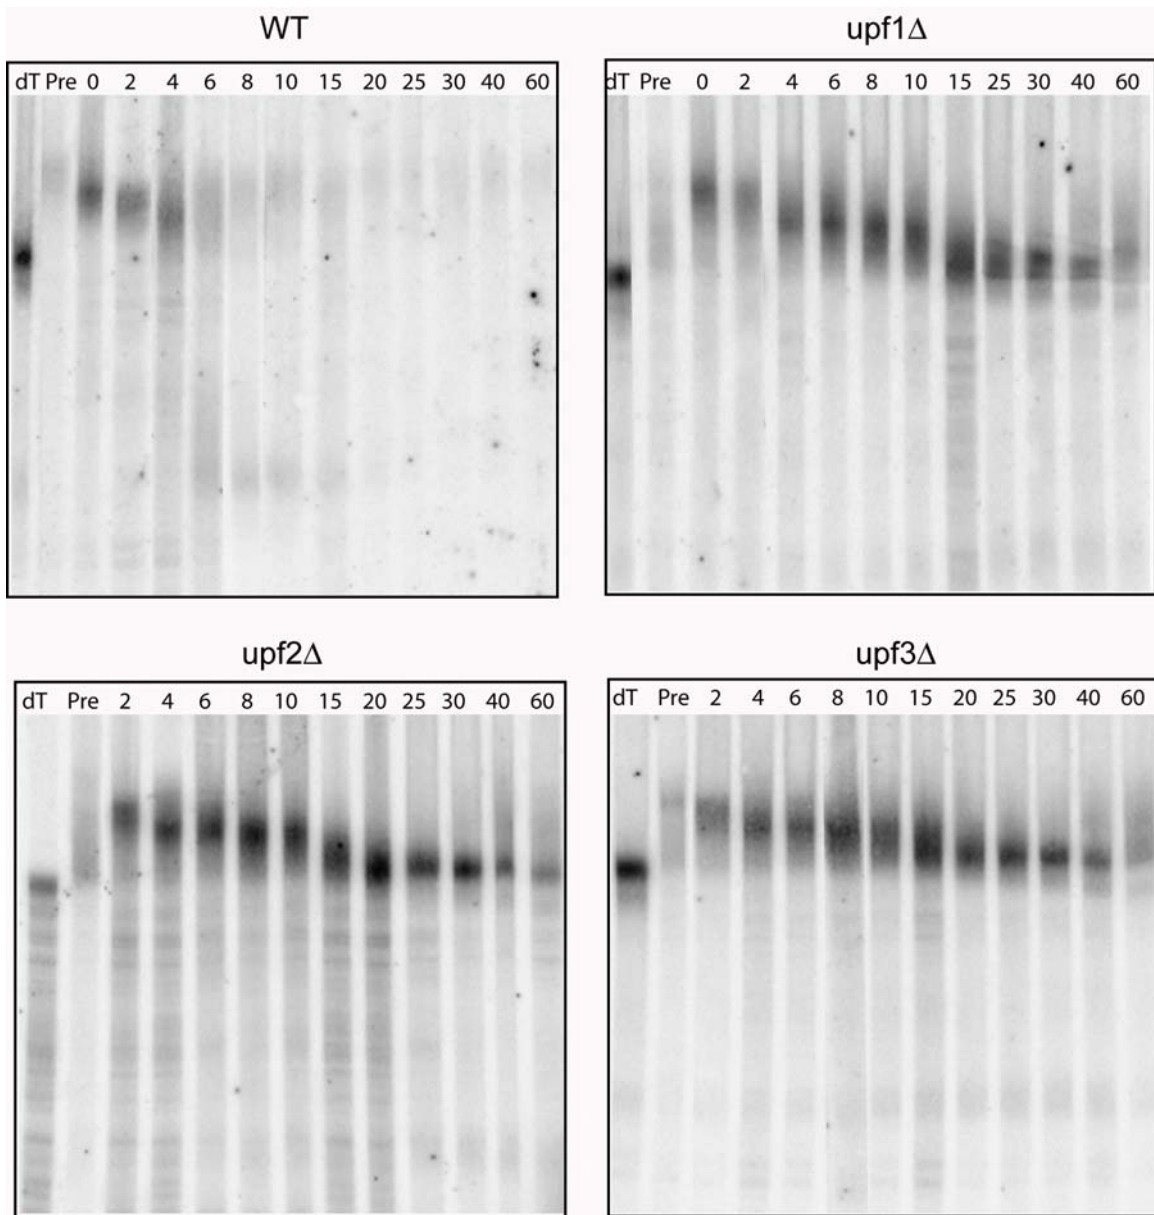

**Figure S3. Transcriptional Pulse-Chase of PGK1C142**

Top; WT and *upf1*Δ, bottom; *upf2*Δ, and *upf3*Δ strains. Plasmid pRP1076 (Cao and Parker, 2003) was introduced into the strains by transformation and transcriptional pulse chase performed as previously described (Decker and Parker, 1993)

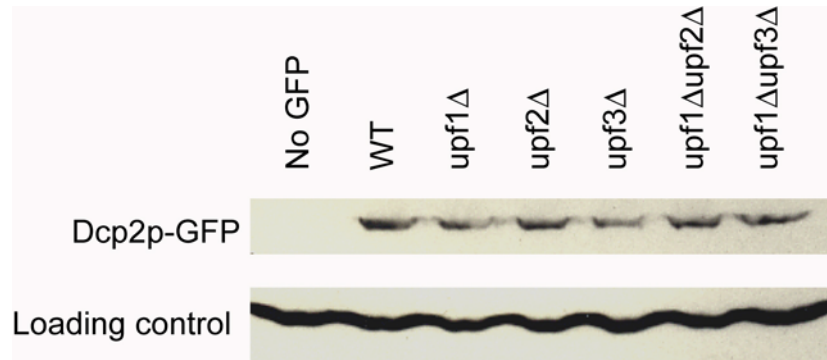

**Figure S4. Western Analysis of Dcp2p-GFP**

The levels of Dcp2p-GFP were compared in all strains by western analysis using antibodies to GFP (Covance). Equal amounts of protein were loaded and a nonspecific band was used as a loading control.

**Table S1. Yeast Strains Used/Generated in This Study**

| <b>Strain</b> | <b>Genotype</b>                                                                           | <b>Source</b>               |
|---------------|-------------------------------------------------------------------------------------------|-----------------------------|
| yRP840        | Mata leu2, trp1, ura3-52, his4, cup1::LEU2/PGK1pG /MFA2pG                                 | (Hatfield et al., 1996a)    |
| yRP841        | Mat $\alpha$ leu2, lys2, trp1, ura3-52, cup1::LEU2/PGK1pG/ MFA2pG                         | (Hatfield et al., 1996b)    |
| yRP1212       | Mata lys2, leu2, trp1, his4, ura3-52, cup1 $\Delta$ ::URA3, upf1 $\Delta$ ::URA3          | (Muhlrad and Parker, 1999b) |
| yRP1305       | Mata leu2, lys2, his4, trp1, ura3-52, cup1 $\Delta$ ::URA3, upf2 $\Delta$ ::NEO           | (Muhlrad and Parker, 1999a) |
| yRP1306       | Mata lys2, leu2, his4, trp1, ura3-52, cup1 $\Delta$ ::URA3, upf3 $\Delta$ ::NEO           | (Muhlrad and Parker, 1999a) |
| yRP1674       | Mata his3, leu2, met15, ura3                                                              | Resgen Genetics             |
| yRP1724       | Mata leu2, trp1, ura3-52, his4, cup1::LEU2/PGK1pG/ MFA2pG, DHH1-GFP (NEO)                 | (Sheth and Parker, 2003)    |
| yRP1727       | Mata leu2, trp1, ura3-52, his4, cup1::LEU2/PGK1pG/MFA2pG, DCP2-GFP (NEO)                  | (Sheth and Parker, 2003)    |
| yRP1729       | Mata leu2, trp1, ura3-52, his4, cup1::LEU2/PGK1pG/ MFA2pG, LSM1-GFP (NEO)                 | (Sheth and Parker, 2003)    |
| yRP1736       | Mata leu2, trp1, ura3-52, his4, cup1::LEU2/PGK1pG/ MFA2pG, dcp1::URA3, DHH1::GFP(NEO)     | (Sheth and Parker, 2003)    |
| yRP1739       | Mata leu2, lys2-201, trp1, ura3-52, cup1::LEU2/PGK1pG/ MFA2pG, lsm1::TRP1, DHH1::GFP(NEO) | (Sheth and Parker, 2003)    |
| yRP1834       | Mata leu2, trp1, ura3-52, his4, cup1::LEU2/PGK1pG/ MFA2pG, UPF1-GFP (NEO)                 | This study                  |
| yRP1836       | Mata leu2, trp1, ura3-52, his4, cup1::LEU2/PGK1pG/ MFA2pG, UPF2-GFP (NEO)                 | This study                  |
| yRP1838       | Mata leu2, trp1, ura3-52, his4, cup1::LEU2/PGK1pG/ MFA2pG, UPF3-GFP (NEO)                 | This study                  |
| yRP1840       | Mata leu2, trp1, his4, cup1::LEU2/PGK1pG/MFA2pG, dcp1 $\Delta$ :: URA3, UPF1-GFP (NEO)    | This study                  |

| <b>Strain</b> | <b>Genotype</b>                                                                            | <b>Source</b> |
|---------------|--------------------------------------------------------------------------------------------|---------------|
| yRP1842       | Mata leu2, cup1::LEU2/PGK1pG/MFA2pG, dcp1Δ:: URA3, UPF2-GFP (NEO)                          | This study    |
| yRP1844       | Mata leu2, cup1::LEU2/PGK1pG/MFA2pG, dcp1Δ:: URA3, UPF3-GFP (NEO)                          | This study    |
| yRP1846       | Mata leu2, his4, ura3-52, cup1::LEU2/PGK1pG/MFA2pG, lsm1Δ:: TRP1, UPF1-GFP (NEO)           | This study    |
| yRP1848       | Mata leu2, ura3-52, lys2, cup1::LEU2/PGK1pG/MFA2pG, lsm1Δ:: TRP1, UPF2-GFP (NEO)           | This study    |
| yRP1850       | Mata leu2, ura3-52, his4, lys2, cup1::LEU2/PGK1pG/MFA2pG, lsm1Δ:: TRP1, UPF3-GFP (NEO)     | This study    |
| yRP1852       | Mat a leu2, ura3-52, his4, cup1::LEU2/PGK1pG/MFA2pG, dcp2Δ:: TRP1, UPF1-GFP (NEO)          | This study    |
| yRP1854       | Mata leu2, ura3-52, lys2, cup1::LEU2/PGK1pG/MFA2pG, dcp2Δ:: TRP1, UPF2-GFP (NEO)           | This study    |
| yRP1856       | Mata leu2, ura3-52, lys2, his4, cup1::LEU2/PGK1pG/MFA2pG dcp2Δ:: TRP1, UPF3-GFP (NEO)      | This study    |
| yRP1858       | Mata leu2, ura3-52, lys2, his4, trp1, upf1Δ:: URA3, LSM1-GFP (NEO)                         | This study    |
| yRP1860       | Mata leu2, ura3-52, lys2, his4, trp1, cup1Δ:: URA3, upf2Δ:: NEO LSM1-GFP (NEO)             | This study    |
| yRP1862       | Mata leu2, ura3-52, lys2, his4, trp1, cup1Δ:: URA3 upf3Δ:: NEO, LSM1-GFP (NEO)             | This study    |
| yRP1864       | Mata leu2, ura3-52, lys2, his4, trp1, upf1Δ:: URA3, DCP2-GFP (NEO)                         | This study    |
| yRP1866       | Mata leu2, ura3-52, lys2, his4, trp1, upf2Δ::NEO, DCP2-GFP (NEO)                           | This study    |
| yRP1868       | Mata leu2, ura3-52, lys2, his4, trp1, cup1Δ::URA3, upf3Δ::NEO, DCP2-GFP (NEO)              | This study    |
| yRP1870       | Mata leu2, ura3-52, lys2, his4, trp2, cup1Δ::URA3, upf2Δ::NEO, UPF1-GFP (NEO)              | This study    |
| yRP1872       | Mata leu2, ura3-52, his4, trp1, cup1::LEU2/PGK1pG/MFA2pG, upf3Δ::NEO, UPF1-GFP (NEO)       | This study    |
| yRP1874       | Mata leu2, ura3-52, lys1, his4, trp1,cup1::LEU2/PGK1pG/MFA2pG, upf1Δ::URA3, UPF2-GFP (NEO) | This study    |

| <b>Strain</b> | <b>Genotype</b>                                                                            | <b>Source</b>   |
|---------------|--------------------------------------------------------------------------------------------|-----------------|
| yRP1876       | Mata leu2,ura3-52, his4, trp1 cup1::LEU2/PGK1pG/MFA2pG, upf3Δ::NEO, UPF2-GFP (NEO)         | This study      |
| yRP1878       | Mata leu2, ura3-52, lys2, his4, trp1, upf1Δ::URA3, UPF3-GFP (NEO)                          | This study      |
| yRP1880       | Mata leu2, ura3-52, lys2, his4, trp1,cup1Δ::URA3, upf2Δ::NEO, UPF3-GFP (NEO)               | This study      |
| yRP1898       | Mata leu2, ura3-52, lys2, trp1, upf1::URA3, DHH1-GFP (NEO)                                 | This study      |
| yRP1900       | Mata leu2, ura3-52, lys2, his4, trp1,cup1Δ::URA3, upf2Δ::NEO, DHH1-GFP (NEO)               | This study      |
| yRP1906       | Mata leu2, ura3-52, lys2, his4, trp1, cup1Δ::URA3, upf1Δ::URA3, upf2Δ::NEO, DCP2-GFP (NEO) | This study      |
| yRP2077       | Mata, ura3, his3, leu2, met15, upf1::NEO                                                   | Resgen Genetics |
| yRP2078       | Mata, ura3, his3, leu2, met15, upf2::NEO                                                   | Resgen Genetics |
| yRP2079       | Mata, ura3, his3, leu2, met15, upf3::NEO                                                   | Resgen Genetics |
| yRP2080       | Mata his3, leu2, met15, ura3, Dcp2-GFP (HIS3)                                              | Invitrogen      |
| yRP2081       | Mata his3, leu2, met15, ura3, Dhh1-GFP (HIS3)                                              | Invitrogen      |
| yRP2082       | Mata his3, leu2, met15, ura3, Pat1-GFP (HIS3)                                              | Invitrogen      |
| yRP2083       | Mata his3, leu2, met15, ura3, Lsm1-GFP (HIS3)                                              | Invitrogen      |
| yRP2084       | Mata his3, leu2, met15, ura3, Cdc33-GFP (HIS3)                                             | Invitrogen      |
| yRP2085       | Mata leu2, ura3-52, lys2,his4, trp1, cup1Δ::URA3, upf1Δ::URA3 upf3Δ::NEO, DCP2-GFP (NEO)   | This study      |
| yRP2086       | Mata leu2, ura3-52, lys2,his4, trp1, cup1Δ::URA3, upf2Δ::NEO upf3Δ::NEO, DCP2-GFP (NEO)    | This study      |
| yRP2087       | Mata leu2, ura3-52, lys2,his4, trp1, cup1Δ::URA3, upf1Δ::NEO, Xrn1-GFP (NEO)               | This study      |

| <b>Strain</b> | <b>Genotype</b>                                                                           | <b>Source</b> |
|---------------|-------------------------------------------------------------------------------------------|---------------|
| yRP2088       | Mata leu2, ura3-52, lys2, his4, trp1, cup1Δ::URA3, upf2Δ::NEO, Xrn1-GFP (NEO)             | This study    |
| yRP2089       | Mata ura3-52, his4, trp1, cup1Δ::URA3, upf3Δ::NEO, Xrn1-GFP (NEO)                         | This study    |
| yRP2090       | Mata ura3-52, his4, lys2, trp1, cup1Δ::URA3, upf1::URA3, Dcp1-GFP (NEO)                   | This study    |
| yRP2091       | Mata leu2, ura3-52, lys2, his4, trp1, cup1Δ::URA3, upf2Δ::NEO, Dcp1-GFP (NEO)             | This study    |
| yRP2092       | Mata leu2, ura3-52, his4, trp1, cup1Δ::URA3, upf3Δ::NEO, Dcp1-GFP (NEO)                   | This study    |
| yRP2095       | Mata leu2, ura3-52, lys2, his4, trp1, cup1Δ::URA3, upf3Δ::NEO, Dhh1-GFP (NEO)             | This study    |
| yRP2096       | Mata leu2, ura3-52, lys2, trp1, cup1Δ::URA3, upf1::URA3, Pat1-GFP (NEO)                   | This study    |
| yRP2097       | Mata leu2, ura3-52, lys2, his4, trp1, cup1Δ::URA3, upf2Δ::NEO, Pat1-GFP (NEO)             | This study    |
| yRP2098       | Mata ura3-52, his4, trp1, cup1Δ::URA3, upf3Δ::NEO, Pat1-GFP (NEO)                         | This study    |
| yRP2099       | Mata leu2, ura3-52, lys2, his4, trp1, cup1Δ::URA3, upf2Δ::NEO, upf3Δ::NEO, UPF1-GFP (NEO) | This study    |
| yRP2100       | Mata his3, leu2, met15, ura3, Upf1-GFP (HIS3)                                             | Invitrogen    |
| yRP2101       | Mata his3, leu2, met15, ura3, Upf2-GFP (HIS3)                                             | Invitrogen    |
| yRP2102       | Mata his3, leu2, met15, ura3, Upf3-GFP (HIS3)                                             | Invitrogen    |
| yRP2103       | Mata his3, leu2, met15, ura3, upf1Δ::NEO, upf2Δ::NEO                                      | This study    |
| yRP2104       | Mata his3, leu2, lys2, met15, ura3, upf1Δ::NEO, upf3Δ::NEO                                | This study    |
